# Supplementary material for: Direct fluorescence labelling of NO inside plant cells
Source: Royal Society of Chemistry journal article supplement (doi:10.1039/d3ob01647a), 2023-01-01
Supplement: d3ob01647a1.pdf [file d3ob01647a1.pdf]

## Supporting Information

### **Direct fluorescence labelling of NO inside the plant cells**

Priyotosh Ghosh,<sup>a</sup> Shrabani Saha,<sup>a</sup> Sunanda Mukherjee,<sup>b</sup> Ansuman Chattopadhyay,<sup>b</sup> Prithidipa Sahoo\*<sup>a</sup>

#### **Pages**

|                                                                                     |             |
|-------------------------------------------------------------------------------------|-------------|
| <b>1. Comparison table.....</b>                                                     | <b>2</b>    |
| <b>2. NMR Studies.....</b>                                                          | <b>3-4</b>  |
| <b>3. UV-Vis and fluorescence titration studies.....</b>                            | <b>5</b>    |
| <b>4. Selectivity.....</b>                                                          | <b>6</b>    |
| <b>5. Competitive selectivity in presence of other analytes.....</b>                | <b>6</b>    |
| <b>6. Calculation of limit of detection (LOD) of NPO with NO.....</b>               | <b>7</b>    |
| <b>7. Job's Plot.....</b>                                                           | <b>8</b>    |
| <b>8. Time-dependent fluorescence spectra of NPO<br/>in the presence of NO.....</b> | <b>8</b>    |
| <b>9. pH titration study.....</b>                                                   | <b>9</b>    |
| <b>10. DFT study.....</b>                                                           | <b>9-10</b> |
| <b>11. HRMS spectra.....</b>                                                        | <b>11</b>   |
| <b>12. Confocal images after 36 hours.....</b>                                      | <b>12</b>   |
| <b>13. Synthetic scheme.....</b>                                                    | <b>12</b>   |

**1. Table S1. Comparison table**

| Analytes             | Sensor type                    | Detection method                       | Application                                                                                     | References                                                              |
|----------------------|--------------------------------|----------------------------------------|-------------------------------------------------------------------------------------------------|-------------------------------------------------------------------------|
| <b>NO</b>            | 2-hydroxynaphthaldehyde        | <b>Naked-eye, UV-Vis, Fluorescence</b> | <b>Detection of NO in endogenous plant cell</b>                                                 | <b>Present manuscript</b>                                               |
| <b>NO</b>            | 1,8-naphthalimide              | UV-Vis                                 | fluorescence imaging of NO in HT29 cells (Human colon adenocarcinoma grade II cell line)        | Dyes and Pigments 2013, 96, 333-337                                     |
| <b>NO</b>            | Pyrene based                   | UV-Vis, Fluorescence                   | Detection of TNP by the test strip method under day light and UV lamp                           | ACS Omega 2018, 3, 8, 10306–10316                                       |
| <b>NO, Histidine</b> | Rhodamine-based copper complex | Naked-eye, UV-Vis                      | fluorescence images of RAW 264.7 macrophages                                                    | Chempluschem 2014, 79, 1761-1766                                        |
| <b>NO</b>            | Anilino-benzothiazole          | UV-Vis, Fluorescence                   | Detection in HeLa cells. Fluorescence images were acquired by confocal microscopy.              | Sensors and Actuators B: Chemical 2018,259, 347-353.                    |
| <b>NO</b>            | N-nitrosation-based            | UV-Vis, Fluorescence                   | Fluorescence imaging endogenous NO in living cells of zebrafish                                 | Sensors and Actuators B: Chemical 2021, 329, 129147                     |
| <b>NO</b>            | Rhodamine based                | UV-Vis, Fluorescence                   | live-cellular imaging                                                                           | Dyes and Pigments, 2023 215, 111284                                     |
| <b>NO</b>            | 1,8-naphthalimide              | UV-Vis, Fluorescence                   | the detection of intracellular nitric oxide concentrations in macrophages and endothelial cells | Journal of Photochemistry and Photobiology B: Biology 2022, 234, 112512 |
| <b>NO</b>            | Hemicyanine-based              | UV-Vis, on-off Fluorescence            | imaging NO in living cells                                                                      | Dyes and Pigments 2022,197, 109871                                      |

## 2. NMR Studies

### $^1\text{H}$ NMR of NPO in $\text{DMSO-d}_6$

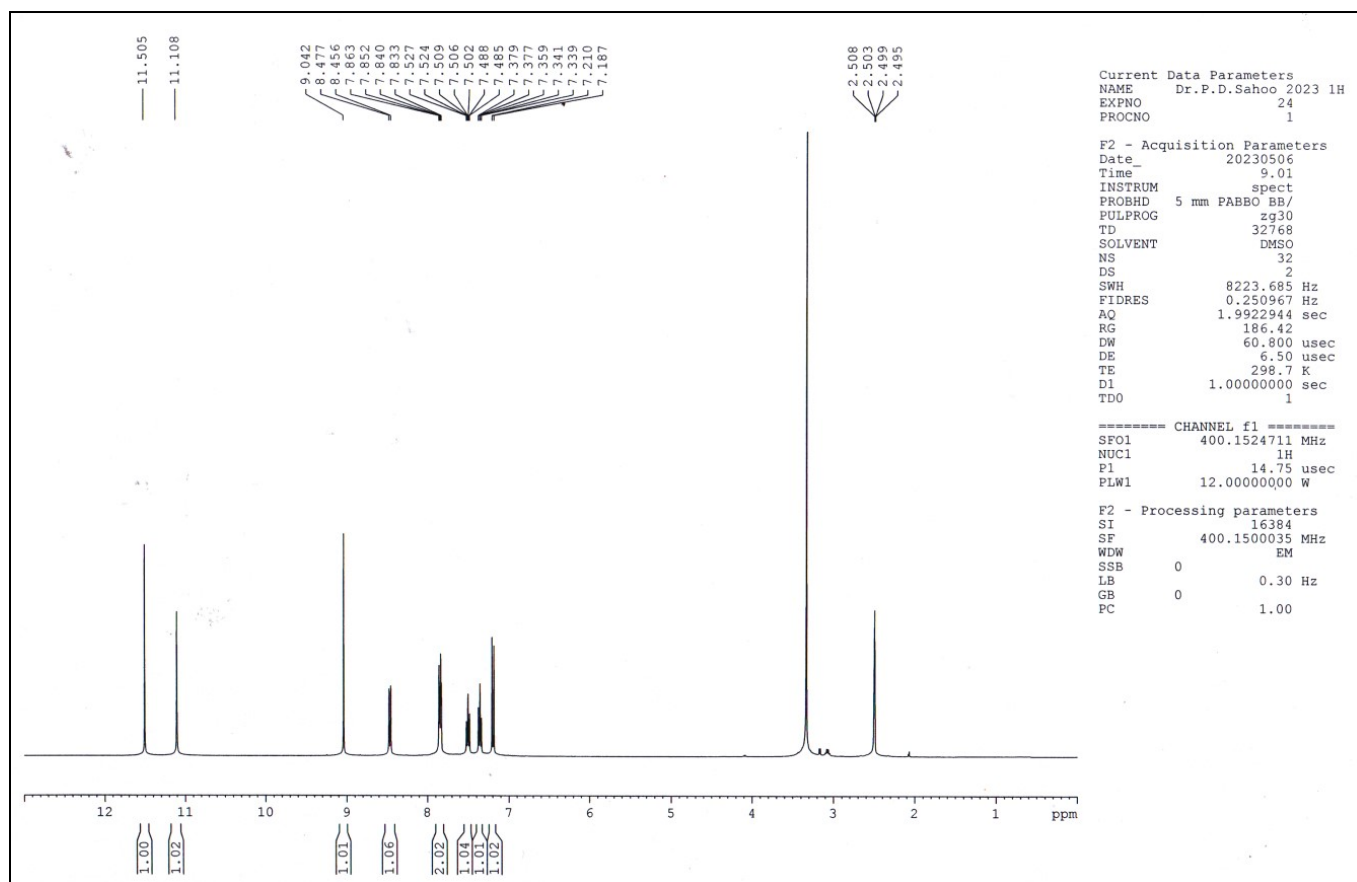

Figure S1.  $^1\text{H}$  NMR of NPO in  $\text{DMSO-d}_6$  (400 MHz).

# $^{13}\text{C}$ NMR of NPO in $\text{DMSO-d}_6$ :

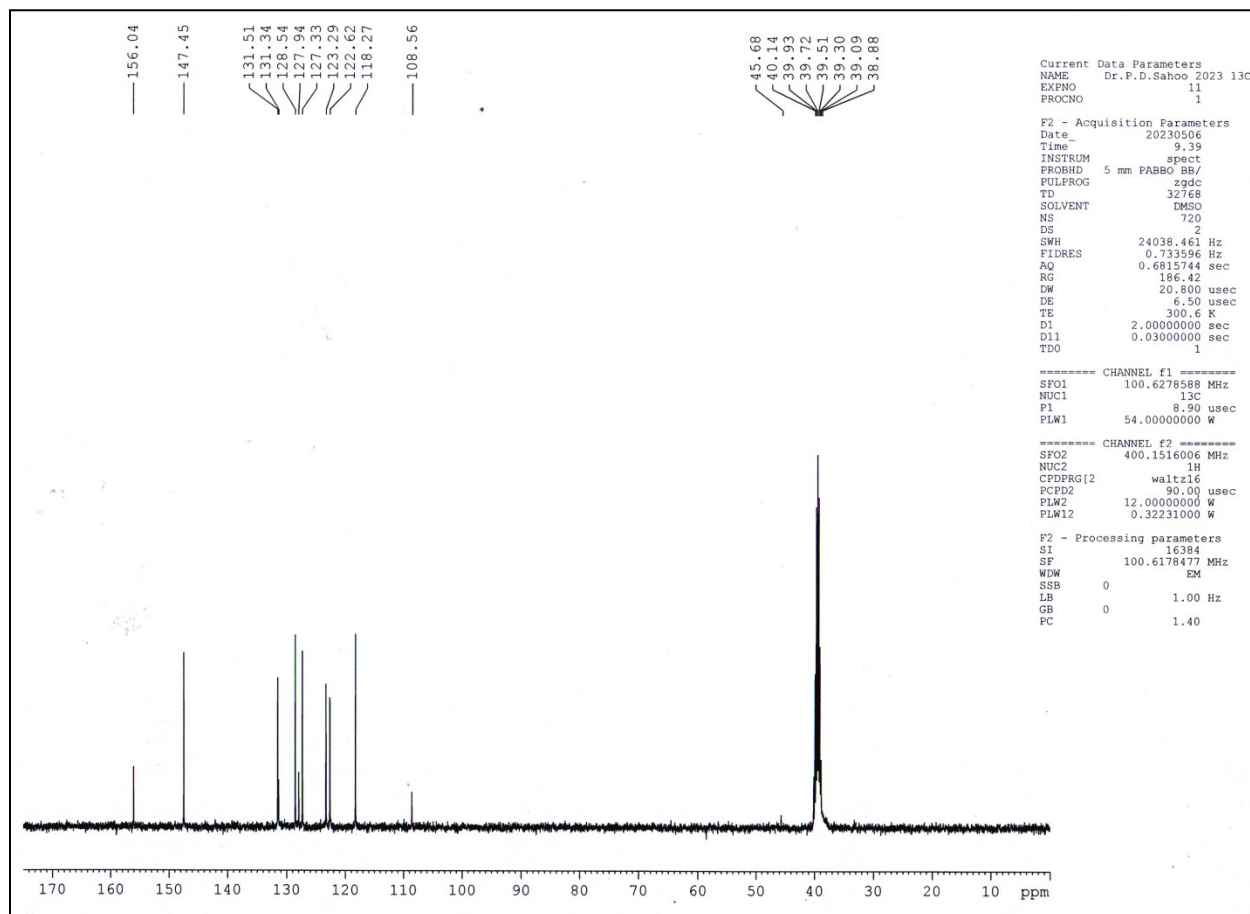

Figure S2.  $^{13}\text{C}$  NMR of NPO in  $\text{DMSO-d}_6$  (100 MHz).

### 3. UV-Vis and fluorescence titration studies

#### UV-vis spectral studies:

A stock solution of **NPO** ( $1 \times 10^{-5}$  M) was prepared in water-DMSO (4:1, v/v). **NO** solution of concentration  $1 \times 10^{-4}$  M was prepared. All experiments were carried out in aqueous medium at neutral pH. During the titration, each time a  $1 \times 10^{-5}$  M solution of **NPO** was filled in a quartz optical cell of 1 cm optical path length and **NO** stock solution was added into the quartz optical cell gradually by using a micropipette.

#### Fluorescence spectral studies:

A stock solution of **NPO** ( $1 \times 10^{-5}$  M) was prepared in water-DMSO (4:1, v/v). **NO** solution of concentration  $1 \times 10^{-4}$  M was prepared. All experiments were carried out in aqueous medium at neutral pH. During titration, each time a  $1 \times 10^{-5}$  M solution of **NPO** was filled in a quartz optical cell of 1 cm optical path length and **NO** stock solution was added into the quartz optical cell gradually by using a micropipette. For all fluorescence measurements, excitations were provided at 310 nm, and emissions were collected from 350 to 530 nm.

## 4. Selectivity

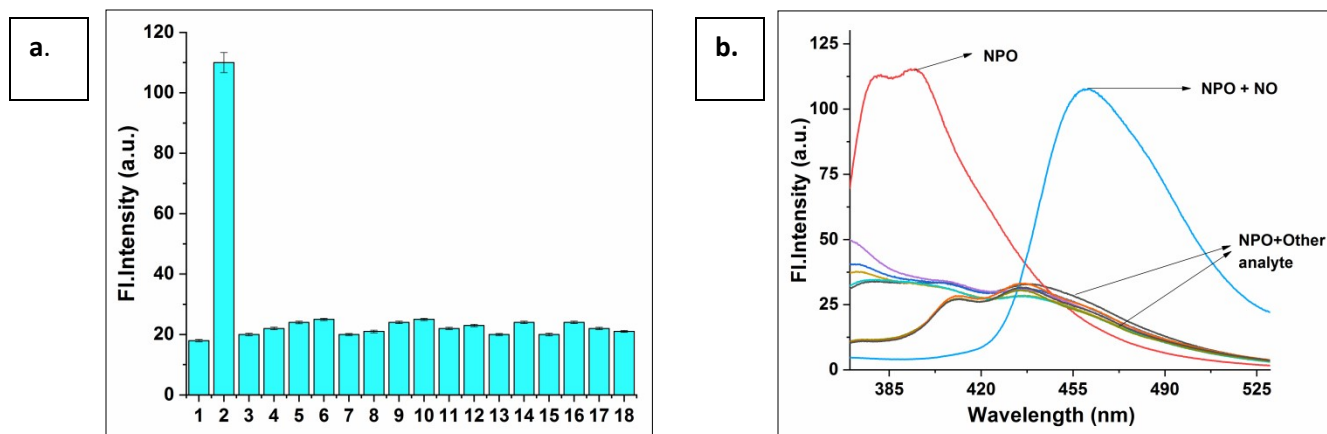

**Figure S3.** (a) fluorescence spectra of NPO in presence of different analytes ( $4 \times 10^{-5}$  M) at 460 nm ( $\lambda_{\text{ex}} = 310$  nm) in water-DMSO (4:1, v/v) at neutral pH. [1] Blank, 2) NO, 3)  $\text{O}_2$ , 4)  $\bullet\text{OH}$ , 5)  $\text{O}_2^-$ , 6)  $\text{ONOO}^-$ , 7)  $\text{OCl}^-$ , 8)  $\text{SO}_4^{2-}$ , 9)  $\text{NO}_3^-$ , 10)  $\text{H}_2\text{PO}_4^-$ , 11)  $\text{Br}^-$ , 12)  $\text{F}^-$ , 13)  $\text{Cl}^-$ , 14)  $\text{I}^-$ , 15)  $\text{NO}_2^-$ , 16)  $\text{CO}_3^{2-}$ , 17)  $\text{SO}_3^{2-}$ , 18)  $\text{H}_2\text{O}_2$ . (b) Fluorescence spectra of NPO with different analytes.

## 5. Competitive selectivity in presence of other analytes

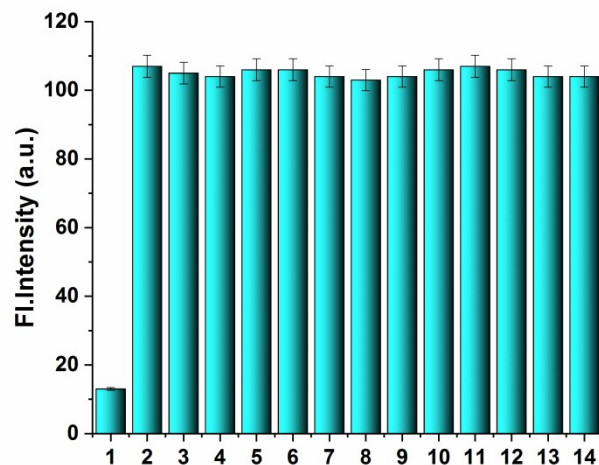

**Figure S4.** fluorescence spectra of NPO in presence of different analytes ( $10^{-5}$  M) at 460 nm ( $\lambda_{\text{ex}} = 310$  nm) in water-DMSO (4:1, v/v) at neutral pH. [1] Blank, 2) NO, 3) NO +  $\text{Zn}^{2+}$ , 4) NO +  $\text{Cu}^{2+}$ , 5) NO +  $\text{Pb}^{2+}$ , 6) NO +  $\text{NO}_2^-$ , 7) NO +  $\text{OCl}^-$ , 8) NO +  $\text{CN}^-$ , 9) NO +  $\text{NO}_3^-$ , 10) NO +  $\text{SO}_4^{2-}$ , 11) NO +  $\text{Br}^-$ , 12) NO +  $\text{F}^-$ , 13) NO +  $\text{Cl}^-$  and 14) NO +  $\text{I}^-$ ,

## 6. Calculation of limit of detection (LOD) of NPO with NO:

The detection limit of the chemosensor **NPO** for **NO** was calculated on the basis of fluorescence titration. To determine the standard deviation for the fluorescence intensity, the emission intensity of four individual receptors without **NO** was measured by 10 times and the standard deviation of blank measurements was calculated.

The limit of detection (LOD) of **NPO** for sensing **NO** was determined from the following equation<sup>2-3</sup>:

$$\text{LOD} = K \times \text{SD}/S$$

Where  $K = 2$  or  $3$  (we take  $3$  in this case);  $\text{SD}$  is the standard deviation of the blank receptor solution;  $S$  is the slope of the calibration curve.

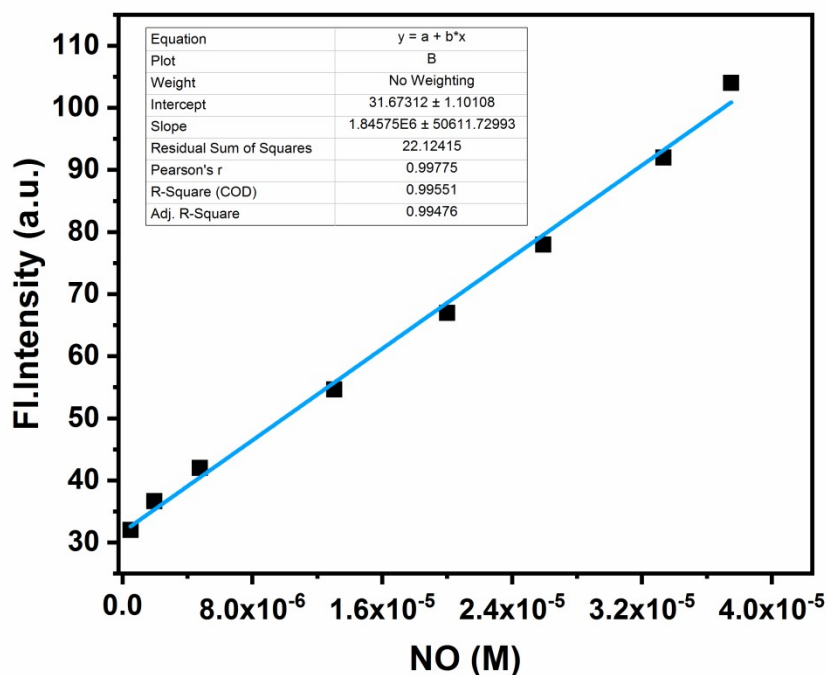

**Figure S5.** Linear fit curve of **NPO** at 460 nm with respect to **NO** concentration ( $10^{-4}$  M).

For **NPO** with **NO**:

From the linear fit graph we get slope =  $1.84575 \times 10^6$ , and SD value is 0.2134.

Thus using the above formula we get the Limit of Detection =  $0.11 \times 10^{-6}$  M or 0.11  $\mu\text{M}$ .

Therefore **NPO** can detect **NO** up to this very lower concentration by fluorescence technique.

## SD Calculation

| Blank Reading (NPO) | Fluorescence Intensities at 460nm(X) | Mean (x) | Standard Deviation<br>$(\sigma) = \sqrt{\frac{\sum  X - x ^2}{N}}$<br> |
|---------------------|--------------------------------------|----------|-----------------------------------------------------------------------------------------------------------------------------------------------------------|
| Reading 1           | 18.57                                | 18.44    | 0.2134                                                                                                                                                    |
| Reading 2           | 18.31                                |          |                                                                                                                                                           |
| Reading 3           | 18.16                                |          |                                                                                                                                                           |
| Reading 4           | 18.42                                |          |                                                                                                                                                           |
| Reading 5           | 18.78                                |          |                                                                                                                                                           |

## 7. Job's Plot

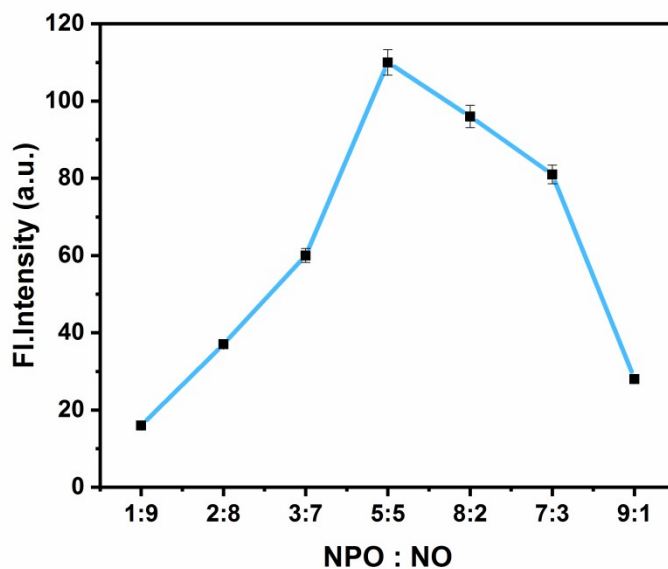

**Figure S6.** Job's plot of **NPO** ( $10^{-5}$  M) with **NO** in water-DMSO (4:1, v/v), at neutral pH, by fluorescence method, which indicate 1:2 stoichiometry for **NPO** with **NO**. Standard deviations are represented by error bar (n=3).



## 8. Time-dependent fluorescence spectra of NPO in the presence of NO.

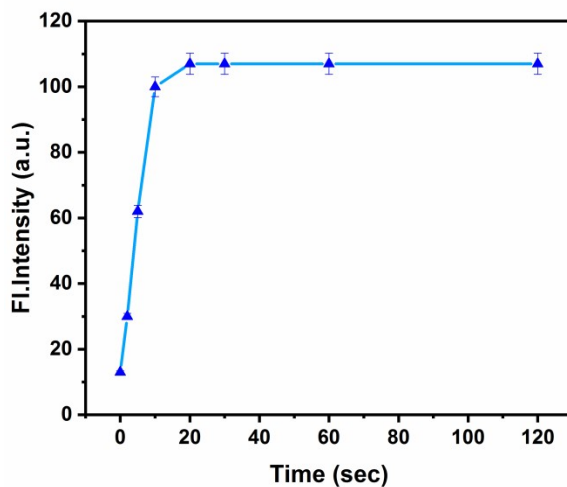

**Figure S7.** Time-dependent fluorescence spectra of NPO ( $10^{-5}$  M) in the presence of NO ( $10^{-4}$  M) in water-DMSO (4:1, v/v) at neutral pH.

## 9. pH titration study:

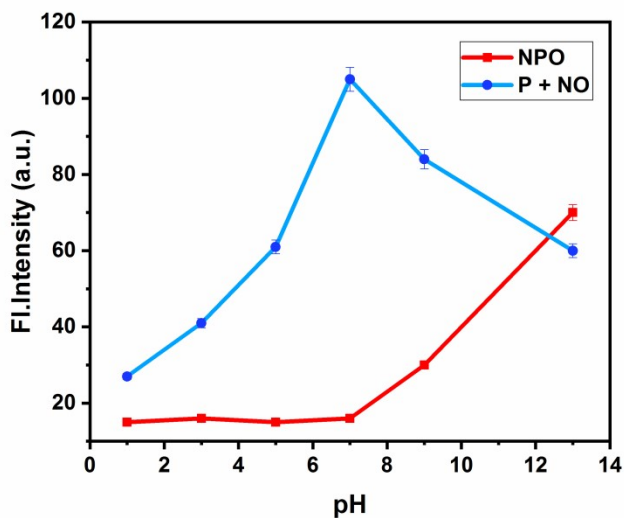

**Figure S8.** Effect of pH on the fluorescence intensity of NPO ( $10^{-5}$  M) in the absence of NO (redline) and in the presence of NO ( $10^{-4}$  M, blue line).

## 10. DFT study

### TDDFT- Calculations

**Table S2.** Selected electronic excitation energies (eV), oscillator strengths (f), main configurations of the low-lying excited states of CPLC. The data were calculated by TDDFT//B3LYP/6-31G(d,p) based on the optimized ground state geometries.

| Molecules  | Electronic Transition           | Excitation Energy <sup>a</sup> | f <sup>b</sup> | Composition <sup>c</sup> (%) |
|------------|---------------------------------|--------------------------------|----------------|------------------------------|
| <b>NPO</b> | S <sub>0</sub> → S <sub>1</sub> | 3.7896 eV 327.17 nm            | 0.1680         | H → L (68.1%)                |

**Table S3. Details of the geometry optimization in Gaussian 09 program**

| Details                     | NPO     | NO <sup>+</sup> | NPO+NO complex | 2 H     |
|-----------------------------|---------|-----------------|----------------|---------|
| <b>Calculation method</b>   | B3LYP   | B3LYP           | B3LYP          | B3LYP   |
| <b>Basis set</b>            | 6-31G** | 6-31G**         | 6-31G**        | 6-31G** |
| <b>E(CAM-B3LYP) (a.u.)</b>  | -629.74 | -129.65         | -758.53        | -1.00   |
| <b>Charge, Multiplicity</b> | 0, 1    | 0,1             | -1,1           | 0,1     |
| <b>Solvent (CPCM)</b>       | Water   | Water           | Water          | Water   |

## 11. HRMS

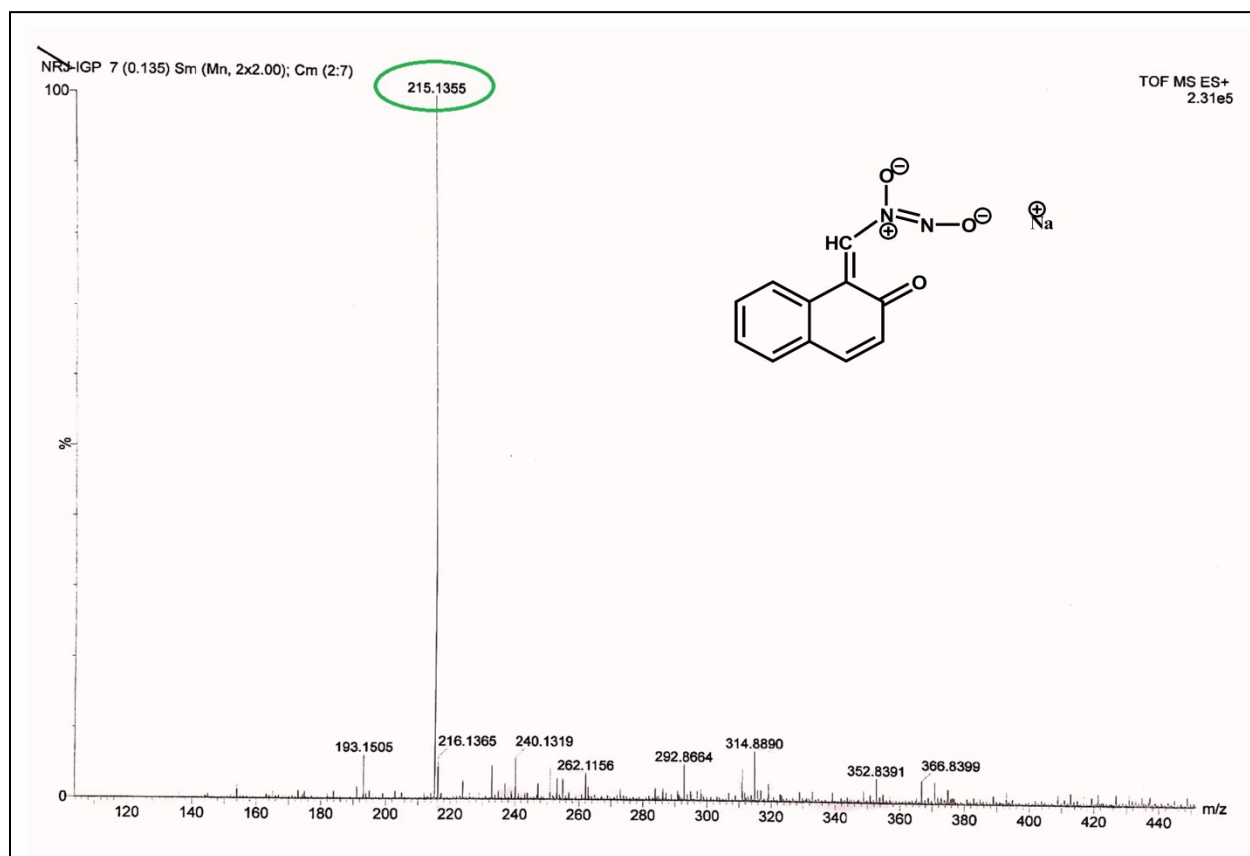

**Figure S9.** HRMS spectra of NPO<sup>+</sup> NO complex (C<sub>11</sub>H<sub>7</sub>N<sub>2</sub>O<sub>3</sub>)

## 12. Confocal images of the stem and root of chickpea saplings after 36 hours treatment with NPO

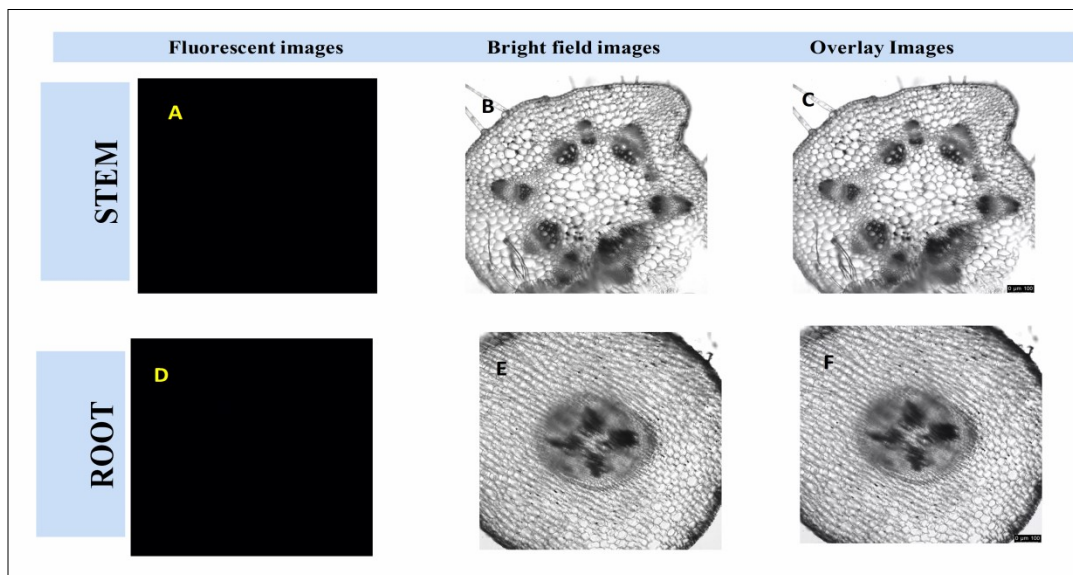

**Figure S10.** Confocal microscopic images of the stem and root of chickpea saplings after 36 hours treatment with NPO. (A,D) are fluorescent images, (B,E) are the bright field images and (C,F) are overlay images of stem and root sections respectively. Scale bars are 100  $\mu\text{m}$ .

## 13. Synthetic scheme

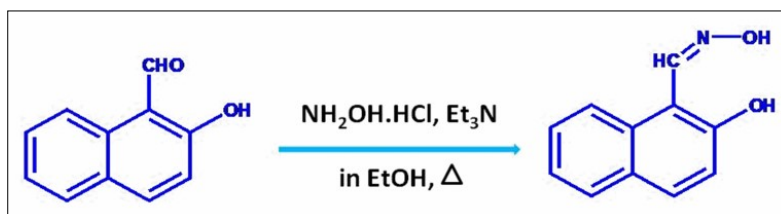

**Figure S11.** Synthesis of NPO
